# Supplementary material for: SPO16 binds SHOC1 to promote homologous recombination and crossing-over in meiotic prophase I
Source: PubMed Central journal article supplement — Sci Adv. 2019 Jan 23;5(1):eaau9780. doi: 10.1126/sciadv.aau9780 (PMC6357729; doi:10.1126/sciadv.aau9780), 2019-01-23
Supplement: aau9780_SM.pdf [file aau9780_SM.pdf]

## Supplementary Materials for

### **SPO16 binds SHOC1 to promote homologous recombination and crossing-over in meiotic prophase I**

Qianting Zhang, Shu-Yan Ji, Kiran Busayavalasa, Chao Yu\*

\*Corresponding author. Email: chao.yu@gu.se

Published 23 January 2019, *Sci. Adv.* 5, eaau9780 (2019)

DOI: 10.1126/sciadv.aau9780

#### **This PDF file includes:**

- Fig. S1. *Mm*SPO16 has a conserved XPF-like domain.
- Fig. S2. Localization of SPO16 and generation of knockout mice.
- Fig. S3. SPO16 deletion leads to massive germline loss.
- Fig. S4. Insufficient meiotic prophase progression in *Spo16*<sup>-/-</sup> testes.
- Fig. S5. Insufficient meiotic recombination in SPO16-deleted spermatocytes and oocytes.
- Fig. S6. Detection of RPA complex in WT and SPO16-deleted spermatocytes.
- Table S1. Genes specifically expressed in meiotic prophase I.
- Table S2. Homology of *Mm*SPO16 to known proteins.
- Table S3. Primer sequences.
- Table S4. Antibody information.



**Fig. S1. *MmSPO16* has a conserved XPF-like domain.** (A) Alignment of SPO16 members showing structural conservation among species. Mm, *Mus musculus*; Hs, *Homo sapiens*; Rn, *Rattus norvegicus*; Gg, *Gallus gallus*; Xt, *Xenopus tropicalis*; Dr, *Danio rerio*; Bf, *Branchiostoma floridae*; Sp, *Stylophora pistillata*; Sk, *Saccoglossus kowalevskii*; La, *Lingula anatina*; Lp, *Limulus polyphemus*; Aq, *Amphimedon queenslandica*. The predicted secondary structural elements of *MmSPO16* are shown above the alignment. Fully conserved amino acid residues are shown in white on a red background, whereas partially conserved residues are shown within blue boxes. (B) PSIPRED secondary structure prediction for *MmSPO16*. (C) FATCAT analysis of the modeled *MmSPO16* (left) compared with the structure of *ApXPF* (PDB: 2bgwA, middle). Both proteins are colored with the rainbow graduation (blue to red from N terminus to C-terminus). In the merged panel (right), *MmSPO16* is shown in grey, whereas *ApXPF* is shown in red. (D) FATCAT analysis of the modeled *MmSPO16* (left) compared with the structure of *ScSPO16* (PDB: 6bzsA, middle). Both proteins are colored with the rainbow graduation (blue to red from N terminus to C-terminus). In the merged panel (right), *MmSPO16* is shown in grey, whereas *ScSPO16* is shown in different colors (separated by twists).

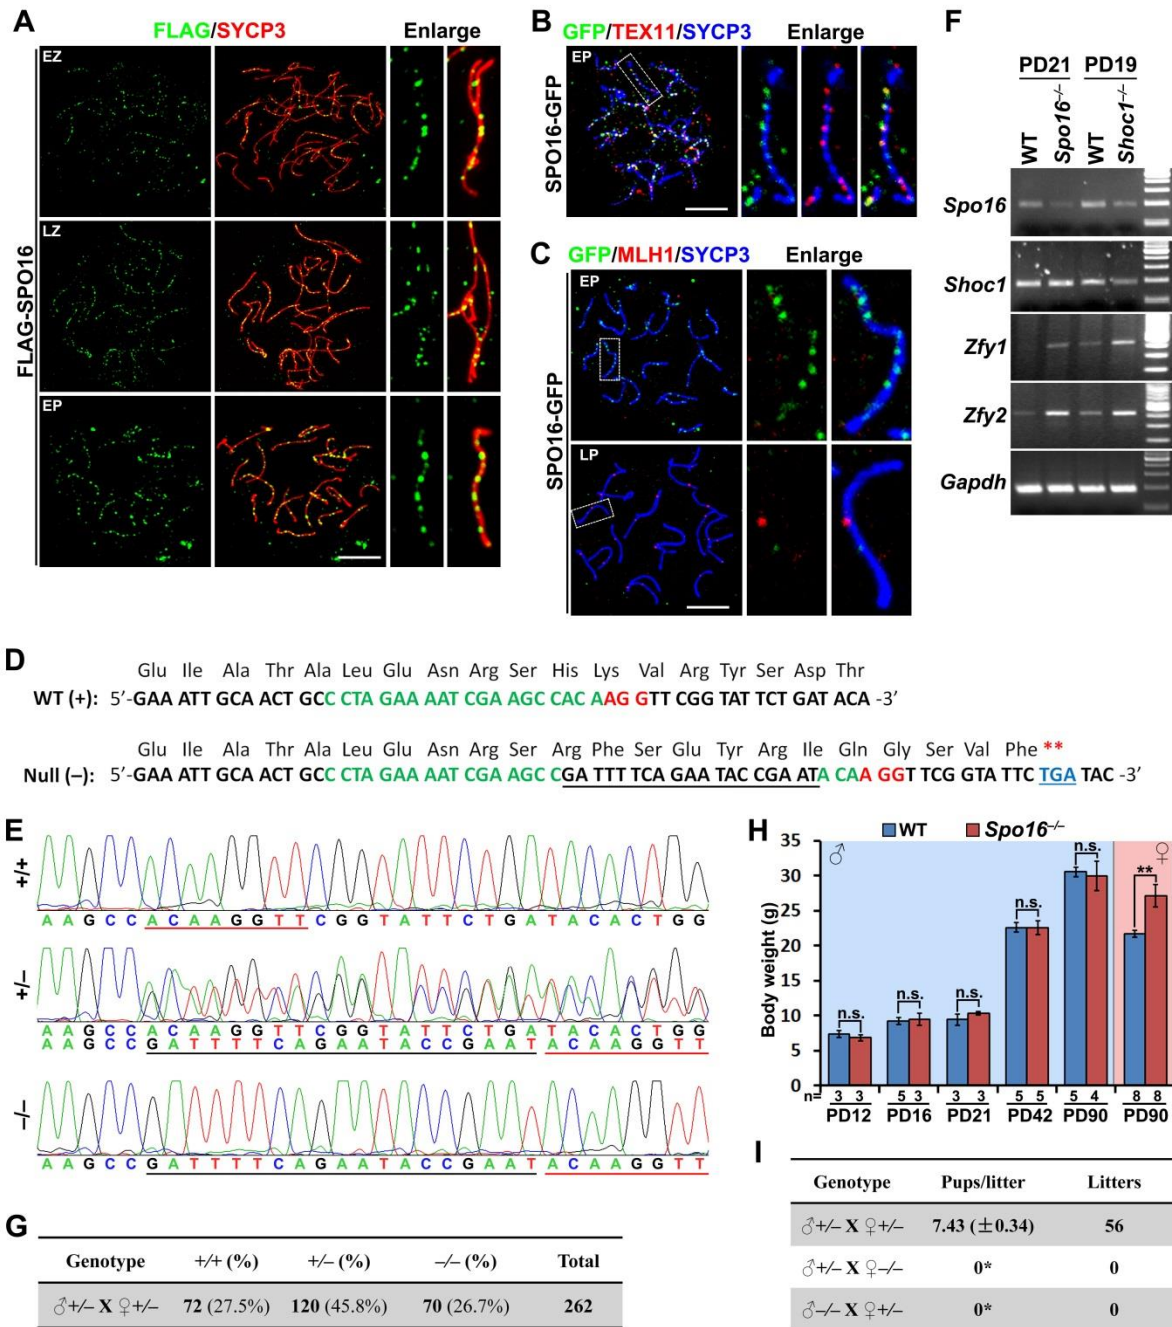

**Fig. S2. Localization of SPO16 and generation of knockout mice.** (A) Immunofluorescent staining of exogenous expressed-, FLAG tagged-SPO16 protein (green) and SYCP3 (red) on the nuclear surface spreads of wild-type testes electroporated with plasmids encoding FLAG-SPO16. SYCP3 marked the meiotic chromosome axes. Enlarged images showed the partially or fully synapsed homologous pairs. EZ, early zygonema; LZ, late zygonema; EP, early pachynema.

Scale bar , 10  $\mu\text{m}$ . **(B)** Co-staining of SPO16-GFP (green) with middle recombination marker TEX11 (red) on the nuclear surface spreads of wild-type testes electroporated with plasmids encoding FLAG-SPO16. Scale bars, 10  $\mu\text{m}$ . **(C)** Co-staining of SPO16-GFP (green) with the late recombination marker MLH1 (red) on the nuclear surface spreads of wild-type testes electroporated with plasmids encoding SPO16-GFP. LP, late pachynema. Scale bars, 10  $\mu\text{m}$ . **(D)** Schematic diagram of the null allele for *Spo16*, which contains a 19-bp insertion within the selected sgRNA and introduces a premature stop codon (\*\*). The insertion was underlined with black color. **(E)** Sequencing results of mice with different genotypes: *Spo16*<sup>+/+</sup>, *Spo16*<sup>+/-</sup> and *Spo16*<sup>-/-</sup>. **(F)** Semi-quantitative PCR showing the relative mRNA level of indicated genes in WT, *Spo16*<sup>-/-</sup> and *Shoc1*<sup>-/-</sup> testes. **(G)** Numbers and percentages of *Spo16*<sup>+/+</sup>, *Spo16*<sup>+/-</sup> and *Spo16*<sup>-/-</sup> pups from *Spo16*<sup>+/-</sup> to *Spo16*<sup>+/-</sup> breeding. **(H)** Growth of WT and *Spo16*<sup>-/-</sup> males as measured by body weight. Numbers of testes analyzed (n) are indicated. Error bars indicate S.E.M. \*\*\* P < 0.001 by two-tailed Student's *t* tests. n.s., not significant. **(I)** Pups/litter and litter numbers analyzed for indicated breeding. \*, no pups or pregnancies were observed through a 3-month breeding. n>6 for each breeding set.

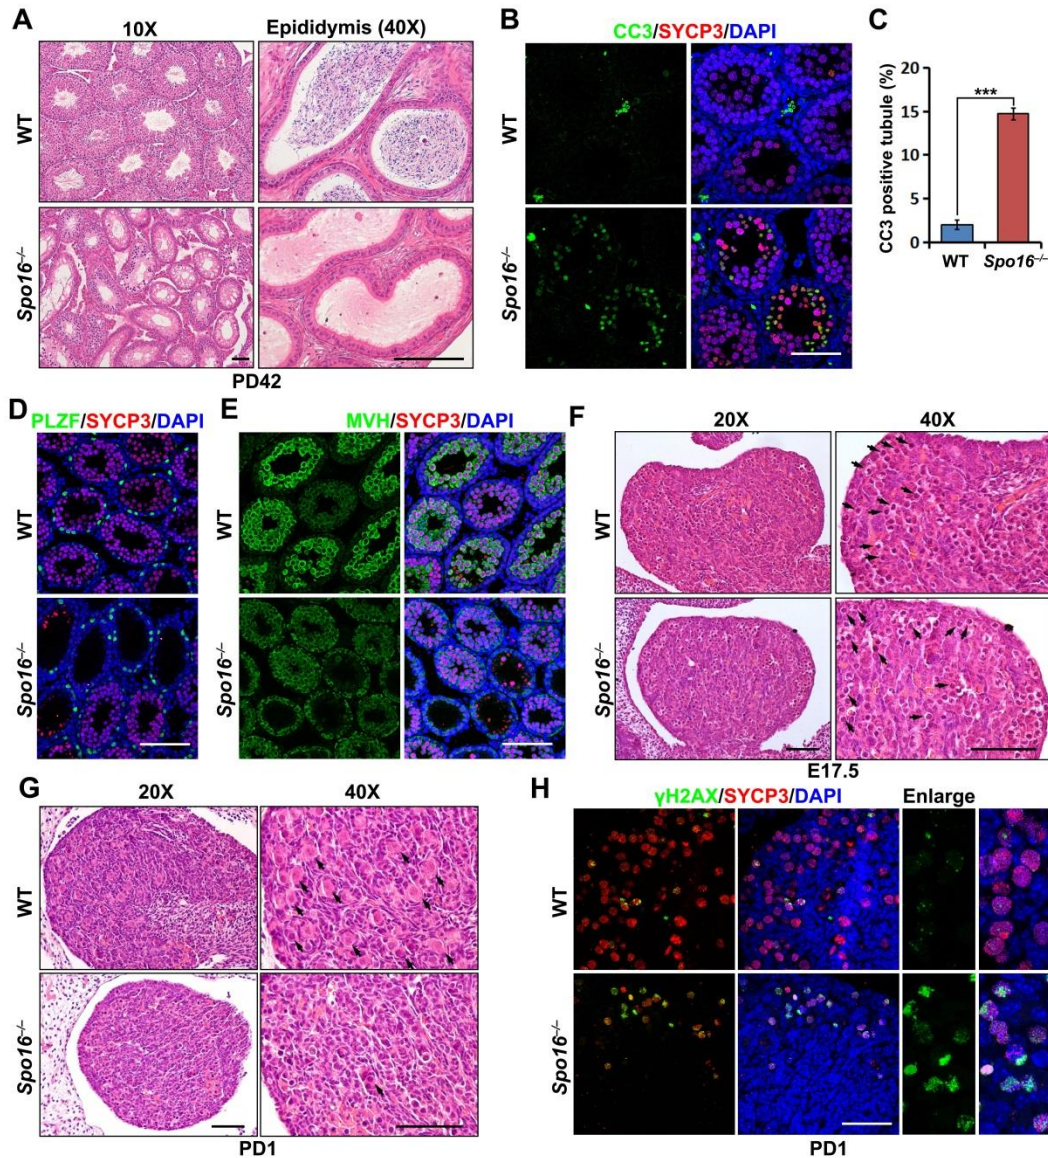

**Fig. S3. SPO16 deletion leads to massive germline loss.** (A) H&E staining showing the histology of testes and epididymis derived from WT and *Spo16*<sup>-/-</sup> males at PD42. Scale bars, 50  $\mu$ m. (B–C) Massive apoptosis in *Spo16*<sup>-/-</sup> testes as shown by cleaved caspase 3 (CC3, green) immunofluorescent staining. Scale bar, 50  $\mu$ m. Error bars indicate S.E.M. \*\*\*  $P < 0.001$  by two-tailed Student's *t* tests. (D–E) PLZF (marker of undifferentiated spermatogonia, D) and MVH (marker of germ cells, E) staining on testes sections at PD21. Scale bars, 100  $\mu$ m. (F–G) H&E staining of ovaries derived from WT and *Spo16*<sup>-/-</sup> females at E17.5 and PD1. Scale bars, 50  $\mu$ m. Arrows indicate oocytes. (H)  $\gamma$ H2AX (green) staining showing the defects in DSB repair in *Spo16*<sup>-/-</sup> PGCs at E17.5. Scale bar, 50  $\mu$ m.

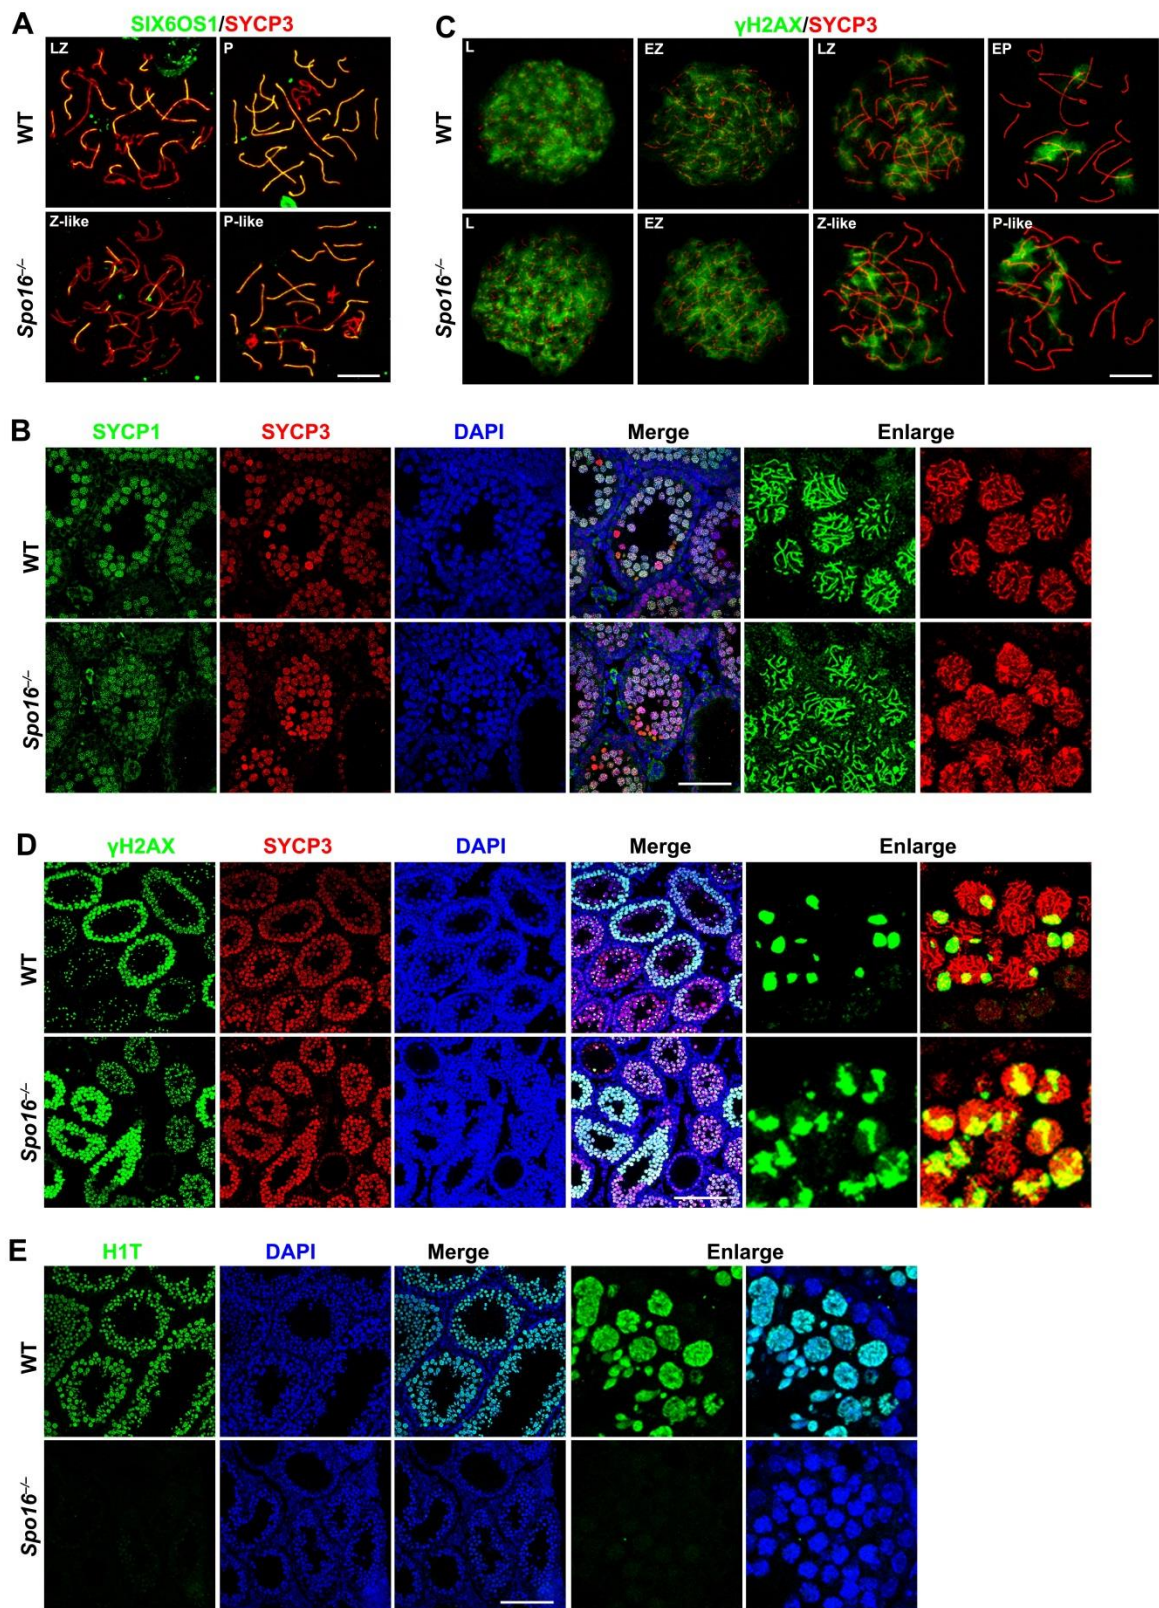

**Fig. S4. Insufficient meiotic prophase progression in *Spo16*<sup>-/-</sup> testes.** (A) Staining of SIX6OS1 (marker of synapsis, green) with SYCP3 (red) on the nuclear surface spreads of spermatocytes derived from WT and *Spo16*<sup>-/-</sup> males at PD42. Z-like, zygonema-like; P-like, pachytenema-like. Scale bar, 10 μm. (B) Staining of SYCP1 with SYCP3 on the sections of WT and *Spo16*<sup>-/-</sup> males at PD21. Scale bar, 50 μm. (C) γH2AX (green) staining on the nuclear surface spreads showing the generation and repair of DSBs during meiotic prophase. Scale bar, 10 μm. (D) γH2AX (green) staining on the sections of WT and *Spo16*<sup>-/-</sup> testes at PD21. Scale bar, 100 μm. (E) H1T staining on the sections of WT and *Spo16*<sup>-/-</sup> testes at PD42. Scale bar, 100 μm.



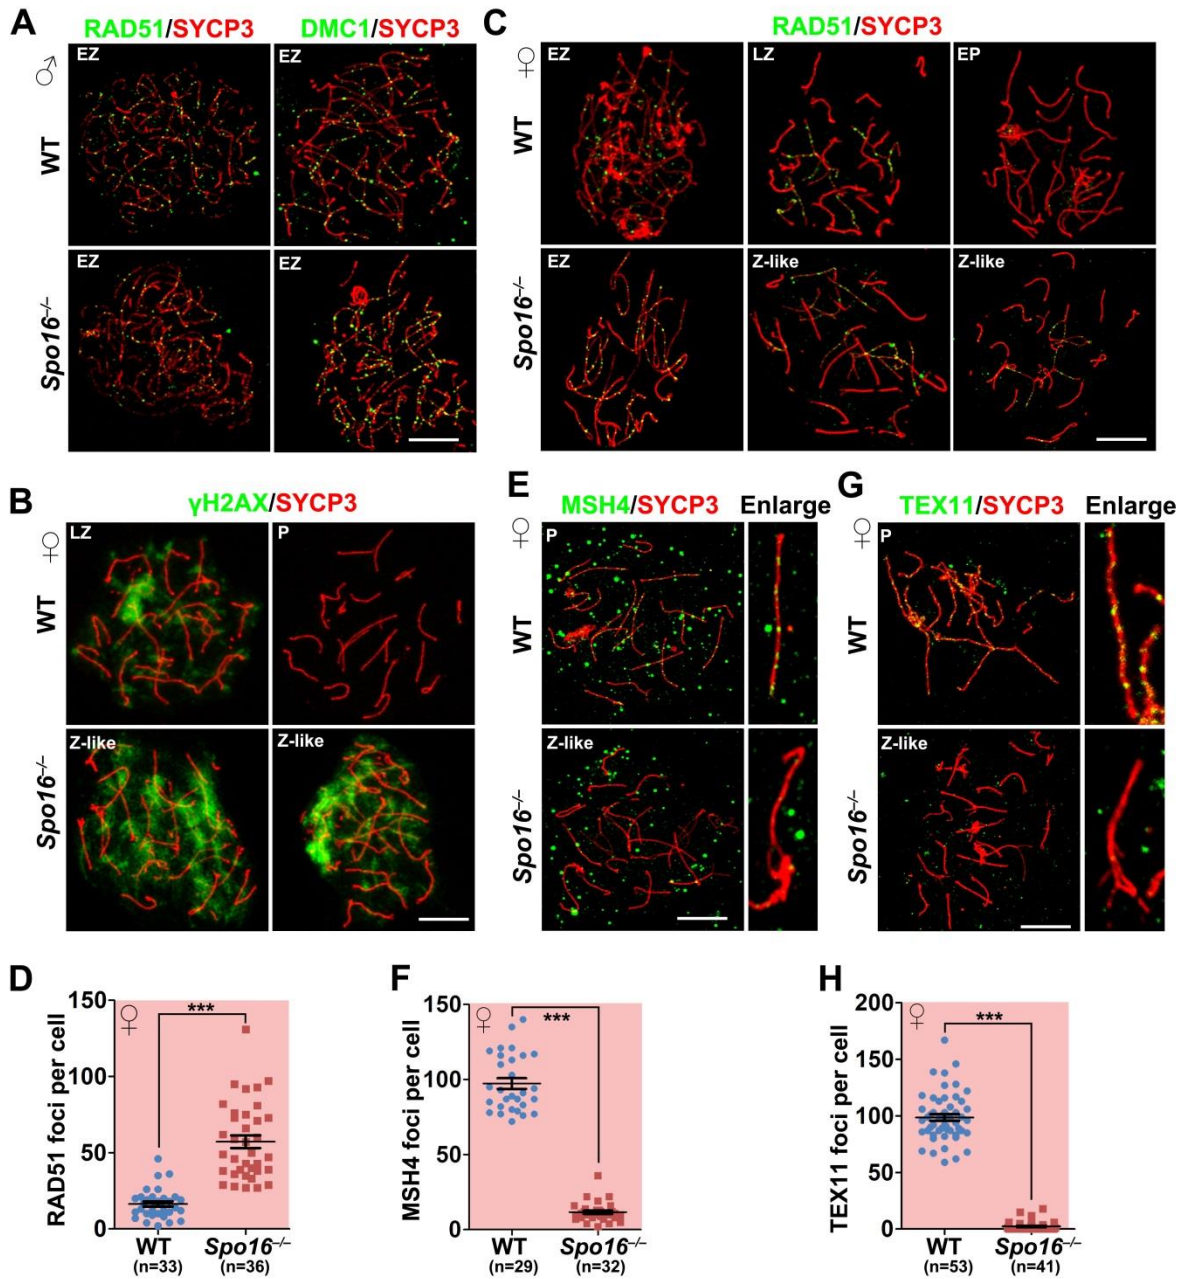

**Fig. S5. Insufficient meiotic recombination in SPO16-deleted spermatocytes and oocytes.** (A) Immunostaining of indicated proteins on WT and *Spo16*<sup>-/-</sup> spermatocytes at early zygotene stage. Scale bar, 10 μm. (B) γH2AX (green) staining showing the unrepaired regions in female PGCs derived from WT and *Spo16*<sup>-/-</sup> ovaries at E17.5. Scale bar, 10 μm. (C–D) RAD51 (green, C) was detected on the nuclear surface spreads of WT and *Spo16*<sup>-/-</sup> PGCs and the quantification of RAD51 foci was shown in (D). Scale bar, 10 μm. Numbers of PGCs analyzed (n) were indicated.

Median focus numbers were marked. Error bars indicated S.E.M. \*\*\*  $P < 0.001$  by two-tailed Student's  $t$  tests. (A–D) MSH4 (A) and TEX11 (B) were detected on the nuclear surface spreads of WT and *Spo16*<sup>-/-</sup> PGCs, and the quantification of their foci was shown in (C) and (D), respectively. Scale bars, 10  $\mu\text{m}$ .

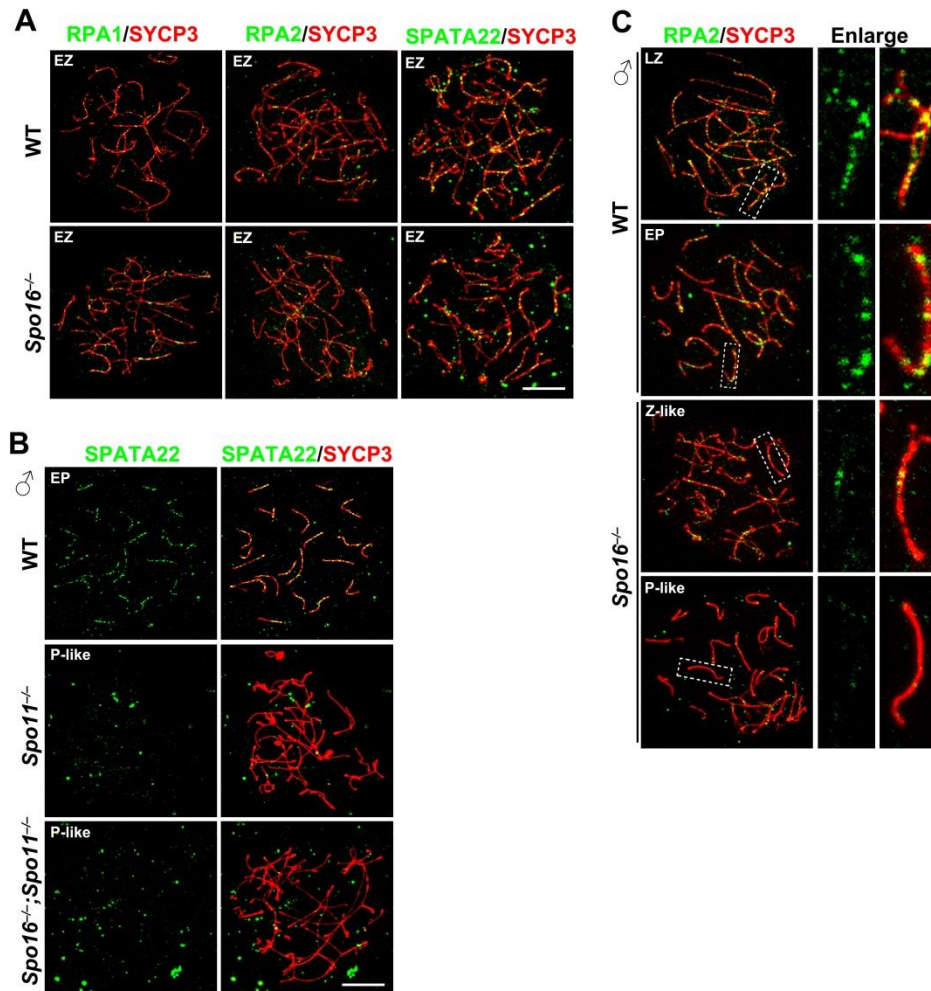

**Fig. S6. Detection of RPA complex in WT and SPO16-deleted spermatocytes. (A)**

Immunostaining of indicated proteins on WT and *Spo16*<sup>-/-</sup> spermatocytes at early zygotene stage.

Scale bar, 10  $\mu$ m. **(B)** SPATA22 (green) was detected on the nuclear surface spreads of WT,

*Spo11*<sup>-/-</sup> and *Spo16*<sup>-/-</sup>; *Spo11*<sup>-/-</sup> spermatocytes. Scale bar, 10  $\mu$ m. **(C)** RPA2 was detected on the

nuclear surface spreads of WT and *Spo16*<sup>-/-</sup> spermatocytes. Scale bar, 10  $\mu$ m.

**Table S1. Genes specifically expressed in meiotic prophase I.**

| Number | Human gene symbol | Mouse gene symbol           | Known in meiosis (Reference) |
|--------|-------------------|-----------------------------|------------------------------|
| 1      | <i>ACSS2</i>      | <i>Acss2</i>                |                              |
| 2      | <i>ADAD1</i>      | <i>Adad1</i>                | Y                            |
| 3      | <i>C9orf84</i>    | <i>Ai481877, Mzip2</i>      | Y                            |
| 4      | <i>AK9</i>        | <i>Ak9</i>                  |                              |
| 5      | <i>ALG13</i>      | <i>Alg13</i>                |                              |
| 6      | <i>ANKRD31</i>    | <i>Ankrd31</i>              |                              |
| 7      | <i>ANKRD7</i>     | <i>Ankrd7</i>               |                              |
| 8      | <i>APTR</i>       | <i>A630072m18rik</i>        |                              |
| 9      | <i>ARHGAP9</i>    | <i>Arhgap9</i>              |                              |
| 10     | <i>ARIH2</i>      | <i>Arih2</i>                |                              |
| 11     | <i>ART3</i>       | <i>Art3</i>                 |                              |
| 12     | <i>ASF1B</i>      | <i>Asf1b</i>                | Y                            |
| 13     | <i>ASZ1</i>       | <i>Asz1</i>                 | Y                            |
| 14     | <i>ATP6AP1</i>    | <i>Atp6ap1</i>              |                              |
| 15     | <i>BBS4</i>       | <i>Bbs4</i>                 |                              |
| 16     | <i>BCAP31</i>     | <i>Bcap31</i>               |                              |
| 17     | <i>BIN2</i>       | <i>Bin2</i>                 |                              |
| 18     | <i>BRD1</i>       | <i>Brd1</i>                 | Y                            |
| 19     | <i>BSCL2</i>      | <i>Bscl2</i>                |                              |
| 20     | <i>BTG3</i>       | <i>Btg3</i>                 |                              |
| 21     | <i>C11orf24</i>   | <i>1810055g02rik</i>        |                              |
| 22     | <i>C11orf48</i>   | <i>Lbhd1</i>                |                              |
| 23     | <i>C11orf65</i>   | <i>4930550c14rik</i>        |                              |
| 24     | <i>C11orf70</i>   | <i>9230110c19rik</i>        |                              |
| 25     | <i>C11orf85</i>   | <i>Majin</i>                | Y                            |
| 26     | <i>C14orf164</i>  | <i>Rnf212b</i>              | Y                            |
| 27     | <i>C14orf39</i>   | <i>Six6os1</i>              | Y                            |
| 28     | <i>C15orf43</i>   | <i>4933406j08rik, Terb2</i> | Y                            |
| 29     | <i>C15orf48</i>   | <i>Aa467197</i>             |                              |
| 30     | <i>C16orf70</i>   | <i>D230025d16rik</i>        |                              |
| 31     | <i>C16orf95</i>   | <i>1700018b08rik</i>        |                              |
| 32     | <i>C17orf104</i>  | <i>Gm1564,meioc</i>         | Y                            |
| 33     | <i>C17orf75</i>   | <i>5730455p16rik</i>        |                              |
| 34     | <i>C18orf63</i>   | <i>Gm17266</i>              |                              |
| 35     | <i>C19orf38</i>   | <i>Ab124611</i>             |                              |
| 36     | <i>C19orf57</i>   | <i>4930432k21rik</i>        |                              |
| 37     | <i>C1orf105</i>   | <i>4930558k02rik</i>        |                              |
| 38     | <i>C1orf146</i>   | <i>1700028k03rik</i>        | <i>Mspo16</i> , this study   |

| <b>Number</b> | <b>Human gene symbol</b> | <b>Mouse gene symbol</b> | <b>Known in meiosis (Reference)</b> |
|---------------|--------------------------|--------------------------|-------------------------------------|
| 39            | <i>C1orf35</i>           | <i>2310033p09rik</i>     |                                     |
| 40            | <i>C20orf194</i>         | <i>4930402h24rik</i>     |                                     |
| 41            | <i>C5orf45</i>           | <i>3010026o09rik</i>     |                                     |
| 42            | <i>C5orf47</i>           | <i>4930524b15rik</i>     |                                     |
| 43            | <i>C9orf43</i>           | <i>4933430i17rik</i>     |                                     |
| 44            | <i>CAMSAP1</i>           | <i>Camsap1</i>           |                                     |
| 45            | <i>CAPN3</i>             | <i>Capn3</i>             |                                     |
| 46            | <i>CCDC11</i>            | <i>Ccdc11</i>            |                                     |
| 47            | <i>CCDC150</i>           | <i>Ccdc150</i>           |                                     |
| 48            | <i>CCDC151</i>           | <i>Ccdc151</i>           |                                     |
| 49            | <i>CCDC152</i>           | <i>Ccdc152</i>           |                                     |
| 50            | <i>CCDC155</i>           | <i>Ccdc155</i>           | Y                                   |
| 51            | <i>CCDC172</i>           | <i>Ccdc172</i>           |                                     |
| 52            | <i>CCDC173</i>           | <i>Ccdc173</i>           |                                     |
| 53            | <i>CCDC176</i>           | <i>Ccdc176</i>           |                                     |
| 54            | <i>CCDC181</i>           | <i>Ccdc181</i>           |                                     |
| 55            | <i>CCDC42</i>            | <i>Ccdc42</i>            |                                     |
| 56            | <i>CCDC7</i>             | <i>Ccdc7</i>             |                                     |
| 57            | <i>CCDC73</i>            | <i>Ccdc73</i>            |                                     |
| 58            | <i>CCDC88A</i>           | <i>Ccdc88A</i>           |                                     |
| 59            | <i>CCDC93</i>            | <i>Ccdc93</i>            |                                     |
| 60            | <i>CCNB3</i>             | <i>Ccnb3</i>             | Y                                   |
| 61            | <i>CCNE1</i>             | <i>Ccne1</i>             | Y                                   |
| 62            | <i>CCNE2</i>             | <i>Ccne2</i>             | Y                                   |
| 63            | <i>CCT6B</i>             | <i>Cct6b</i>             |                                     |
| 64            | <i>CDC45</i>             | <i>Cdc45</i>             |                                     |
| 65            | <i>CDK16</i>             | <i>Cdk16</i>             | Y                                   |
| 66            | <i>CDKL3</i>             | <i>Cdkl3</i>             |                                     |
| 67            | <i>CENPU</i>             | <i>Cenpu</i>             |                                     |
| 68            | <i>CHAF1A</i>            | <i>Chaf1a</i>            |                                     |
| 69            | <i>CHIC2</i>             | <i>Chic2</i>             |                                     |
| 70            | <i>CIAPIN1</i>           | <i>Ciapin1</i>           |                                     |
| 71            | <i>CIPC</i>              | <i>Cipc</i>              |                                     |
| 72            | <i>CLNS1A</i>            | <i>Clns1a</i>            |                                     |
| 73            | <i>CMTR1</i>             | <i>Cmtr1</i>             |                                     |
| 74            | <i>CNTD1</i>             | <i>Cntd1</i>             | Y                                   |
| 75            | <i>CNTRL</i>             | <i>Cntrl</i>             |                                     |
| 76            | <i>COL17A1</i>           | <i>Col17a1</i>           |                                     |
| 77            | <i>CRAT</i>              | <i>Crat</i>              |                                     |
| 78            | <i>CTCFL</i>             | <i>Ctcf1</i>             | Y                                   |

| <b>Number</b> | <b>Human gene symbol</b> | <b>Mouse gene symbol</b> | <b>Known in meiosis (Reference)</b> |
|---------------|--------------------------|--------------------------|-------------------------------------|
| 79            | <i>CTU2</i>              | <i>Ctu2</i>              |                                     |
| 80            | <i>CXorf40A</i>          | <i>1110012119rik</i>     |                                     |
| 81            | <i>CXorf58</i>           | <i>Loc102640868</i>      |                                     |
| 82            | <i>DDX28</i>             | <i>Ddx28</i>             |                                     |
| 83            | <i>DDX39A</i>            | <i>Ddx39a</i>            |                                     |
| 84            | <i>DERL3</i>             | <i>Derl3</i>             |                                     |
| 85            | <i>DFNB59</i>            | <i>Dfnb59</i>            |                                     |
| 86            | <i>DGAT1</i>             | <i>Dgat1</i>             |                                     |
| 87            | <i>DMRTB1</i>            | <i>Dmrtb1</i>            | Y                                   |
| 88            | <i>DMRTC2</i>            | <i>Dmrtc2</i>            | Y                                   |
| 89            | <i>DNMT1</i>             | <i>Dnmt1</i>             | Y                                   |
| 90            | <i>DNTTIP1</i>           | <i>Dnttip1</i>           |                                     |
| 91            | <i>DPEP3</i>             | <i>Dpep3</i>             |                                     |
| 92            | <i>DUS1L</i>             | <i>Dus1l</i>             |                                     |
| 93            | <i>DYDC1</i>             | <i>Dydc1</i>             |                                     |
| 94            | <i>DZIP3</i>             | <i>Dzip3</i>             |                                     |
| 95            | <i>EAF2</i>              | <i>Eaf2</i>              |                                     |
| 96            | <i>EFCAB7</i>            | <i>Efcab7</i>            |                                     |
| 97            | <i>EID3</i>              | <i>Eid3</i>              |                                     |
| 98            | <i>ENKD1</i>             | <i>Enkd1</i>             |                                     |
| 99            | <i>ERAS</i>              | <i>Eras</i>              |                                     |
| 100           | <i>ESCO2</i>             | <i>Esco2</i>             |                                     |
| 101           | <i>EYA3</i>              | <i>Eya3</i>              |                                     |
| 102           | <i>FAM117A</i>           | <i>Fam117a</i>           |                                     |
| 103           | <i>FAM122A</i>           | <i>Fam122a</i>           |                                     |
| 104           | <i>FAM204A</i>           | <i>Fam204a</i>           |                                     |
| 105           | <i>FAM217A</i>           | <i>Fam217a</i>           |                                     |
| 106           | <i>FAM228A</i>           | <i>Fam228a</i>           |                                     |
| 107           | <i>FAM71E1</i>           | <i>Fam71e1</i>           |                                     |
| 108           | <i>FANCA</i>             | <i>Fanca</i>             | Y                                   |
| 109           | <i>FANCL</i>             | <i>Fancl</i>             | Y                                   |
| 110           | <i>FARP2</i>             | <i>Farp2</i>             |                                     |
| 111           | <i>FBXO15</i>            | <i>Fbxo15</i>            |                                     |
| 112           | <i>FBXO25</i>            | <i>Fbxo25</i>            |                                     |
| 113           | <i>FBXO4</i>             | <i>Fbxo4</i>             |                                     |
| 114           | <i>FBXW7</i>             | <i>Fbxw7</i>             |                                     |
| 115           | <i>FH</i>                | <i>Fh</i>                |                                     |
| 116           | <i>FKBP6</i>             | <i>Fkbp6</i>             | Y                                   |
| 117           | <i>FLYWCH2</i>           | <i>Flywch2</i>           |                                     |
| 118           | <i>FOXR1</i>             | <i>Foxr1</i>             |                                     |

| <b>Number</b> | <b>Human gene symbol</b> | <b>Mouse gene symbol</b> | <b>Known in meiosis (Reference)</b> |
|---------------|--------------------------|--------------------------|-------------------------------------|
| 119           | <i>FUK</i>               | <i>Fuk</i>               |                                     |
| 120           | <i>GABPB2</i>            | <i>Gabpb2</i>            |                                     |
| 121           | <i>GDF9</i>              | <i>Gdf9</i>              |                                     |
| 122           | <i>GDPD4</i>             | <i>Gdpd4</i>             |                                     |
| 123           | <i>GINS2</i>             | <i>Gins2</i>             |                                     |
| 124           | <i>GLCC11</i>            | <i>Glcci1</i>            |                                     |
| 125           | <i>GLE1</i>              | <i>Gle1</i>              |                                     |
| 126           | <i>GPAA1</i>             | <i>Gpaal</i>             |                                     |
| 127           | <i>GPAT2</i>             | <i>Gpat2</i>             |                                     |
| 128           | <i>GSAP</i>              | <i>Gsap</i>              |                                     |
| 129           | <i>GTF2A1L</i>           | <i>Gtf2a1l</i>           |                                     |
| 130           | <i>HAUS7</i>             | <i>Haus7</i>             |                                     |
| 131           | <i>HCCS</i>              | <i>Hccs</i>              |                                     |
| 132           | <i>HDAC6</i>             | <i>Hdac6</i>             |                                     |
| 133           | <i>HESX1</i>             | <i>Hesx1</i>             |                                     |
| 134           | <i>HFM1</i>              | <i>Hfm1</i>              | Y                                   |
| 135           | <i>HINFP</i>             | <i>Hinfp</i>             |                                     |
| 136           | <i>HIPK1</i>             | <i>Hipk1</i>             |                                     |
| 137           | <i>HIRIP3</i>            | <i>Hirip3</i>            |                                     |
| 138           | <i>HIST1H3A</i>          | <i>Hist1h3a</i>          |                                     |
| 139           | <i>HIST3H3</i>           | <i>Hist3h3</i>           |                                     |
| 140           | <i>HMCEs</i>             | <i>Hmces</i>             |                                     |
| 141           | <i>HMOX2</i>             | <i>Hmox2</i>             |                                     |
| 142           | <i>HORMAD1</i>           | <i>Hormad1</i>           | Y                                   |
| 143           | <i>HORMAD2</i>           | <i>Hormad2</i>           | Y                                   |
| 144           | <i>HPX</i>               | <i>Hpx</i>               |                                     |
| 145           | <i>HSF2BP</i>            | <i>Hsf2bp</i>            |                                     |
| 146           | <i>HUS1B</i>             | <i>Hus1b</i>             |                                     |
| 147           | <i>IFT122</i>            | <i>Ift122</i>            |                                     |
| 148           | <i>IFT81</i>             | <i>Ift81</i>             |                                     |
| 149           | <i>IL13RA2</i>           | <i>Il13ra2</i>           |                                     |
| 150           | <i>IL23A</i>             | <i>Il23a</i>             |                                     |
| 151           | <i>INCA1</i>             | <i>Inca1</i>             |                                     |
| 152           | <i>IQCB1</i>             | <i>Iqcb1</i>             |                                     |
| 153           | <i>JADE3</i>             | <i>Jade3</i>             |                                     |
| 154           | <i>JOSD2</i>             | <i>Josd2</i>             |                                     |
| 155           | <i>KCTD19</i>            | <i>Kctd19</i>            |                                     |
| 156           | <i>KHDC1</i>             | <i>Khdc1</i>             |                                     |
| 157           | <i>KIAA1715</i>          | <i>Kiaa1715</i>          |                                     |
| 158           | <i>KIF18A</i>            | <i>Kif18a</i>            | Y                                   |

| <b>Number</b> | <b>Human gene symbol</b> | <b>Mouse gene symbol</b> | <b>Known in meiosis (Reference)</b> |
|---------------|--------------------------|--------------------------|-------------------------------------|
| 159           | <i>KLHL20</i>            | <i>Klhl20</i>            |                                     |
| 160           | <i>L3MBTL1</i>           | <i>L3mbtl1</i>           |                                     |
| 161           | <i>LACC1</i>             | <i>Lacc1</i>             |                                     |
| 162           | <i>LCA5L</i>             | <i>Lca5l</i>             |                                     |
| 163           | <i>LCMT2</i>             | <i>Lcmt2</i>             |                                     |
| 164           | <i>LDHC</i>              | <i>Ldhc</i>              | Y                                   |
| 165           | <i>LEAP2</i>             | <i>Leap2</i>             |                                     |
| 166           | <i>LIMK2</i>             | <i>Limk2</i>             | Y                                   |
| 167           | <i>LOC728637</i>         | <i>Meikin</i>            | Y                                   |
| 168           | <i>LOC81691</i>          | <i>2610020h08rik</i>     |                                     |
| 169           | <i>LRRC34</i>            | <i>Lrrc34</i>            |                                     |
| 170           | <i>LRRC46</i>            | <i>Lrrc46</i>            |                                     |
| 171           | <i>LSS</i>               | <i>Lss</i>               |                                     |
| 172           | <i>LY6G5C</i>            | <i>Ly6g5c</i>            |                                     |
| 173           | <i>LY6K</i>              | <i>Ly6k</i>              | Y                                   |
| 174           | <i>LYPD4</i>             | <i>Lypd4</i>             |                                     |
| 175           | <i>LYRM9</i>             | <i>Lyr9</i>              |                                     |
| 176           | <i>LYST</i>              | <i>Lyst</i>              |                                     |
| 177           | <i>MACF1</i>             | <i>Macf1</i>             |                                     |
| 178           | <i>MAD2L1</i>            | <i>Mad2l1</i>            | Y                                   |
| 179           | <i>MAGEB3</i>            | <i>Mageb3</i>            |                                     |
| 180           | <i>MAN1B1</i>            | <i>Man1b1</i>            |                                     |
| 181           | <i>MAP3K3</i>            | <i>Map3k3</i>            |                                     |
| 182           | <i>MCMDC2</i>            | <i>Mcmdc2</i>            | Y                                   |
| 183           | <i>MDH1B</i>             | <i>Mdh1b</i>             |                                     |
| 184           | <i>MED14</i>             | <i>Med14</i>             |                                     |
| 185           | <i>MEI1</i>              | <i>Mei1</i>              | Y                                   |
| 186           | <i>MEIOB</i>             | <i>Meiob</i>             | Y                                   |
| 187           | <i>MLF1</i>              | <i>Mlf1</i>              |                                     |
| 188           | <i>MORN2</i>             | <i>Morn2</i>             |                                     |
| 189           | <i>MOV10L1</i>           | <i>Mov10l1</i>           | Y                                   |
| 190           | <i>MPP2</i>              | <i>Mpp2</i>              |                                     |
| 191           | <i>MSH5</i>              | <i>Msh5</i>              | Y                                   |
| 192           | <i>MTL5</i>              | <i>Mtl5</i>              |                                     |
| 193           | <i>NCAPH2</i>            | <i>Ncaph2</i>            |                                     |
| 194           | <i>NCOA5</i>             | <i>Ncoa5</i>             |                                     |
| 195           | <i>NGLY1</i>             | <i>Ngly1</i>             |                                     |
| 196           | <i>NIPBL</i>             | <i>Nipbl</i>             |                                     |
| 197           | <i>NKAP</i>              | <i>Nkap</i>              |                                     |
| 198           | <i>NKIRAS1</i>           | <i>Nkiras1</i>           |                                     |



| <b>Number</b> | <b>Human gene symbol</b> | <b>Mouse gene symbol</b> | <b>Known in meiosis (Reference)</b> |
|---------------|--------------------------|--------------------------|-------------------------------------|
| 199           | <i>NOL8</i>              | <i>Nol8</i>              |                                     |
| 200           | <i>NRIP3</i>             | <i>Nrip3</i>             |                                     |
| 201           | <i>NSRP1</i>             | <i>Nsrp1</i>             |                                     |
| 202           | <i>NSUN7</i>             | <i>Nsun7</i>             |                                     |
| 203           | <i>NUP210L</i>           | <i>Nup210l</i>           |                                     |
| 204           | <i>OSCP1</i>             | <i>Oscp1</i>             |                                     |
| 205           | <i>PANK3</i>             | <i>Pank3</i>             |                                     |
| 206           | <i>PARP12</i>            | <i>Parp12</i>            |                                     |
| 207           | <i>PARP6</i>             | <i>Parp6</i>             |                                     |
| 208           | <i>PCID2</i>             | <i>Pcid2</i>             |                                     |
| 209           | <i>PDHA1</i>             | <i>Pdha1</i>             |                                     |
| 210           | <i>PDIA3</i>             | <i>Pdia3</i>             |                                     |
| 211           | <i>PDPK1</i>             | <i>Pdpk1</i>             |                                     |
| 212           | <i>PEX12</i>             | <i>Pex12</i>             |                                     |
| 213           | <i>PEX5</i>              | <i>Pex5</i>              |                                     |
| 214           | <i>PHF7</i>              | <i>Phf7</i>              |                                     |
| 215           | <i>PHF8</i>              | <i>Phf8</i>              |                                     |
| 216           | <i>PHLPP1</i>            | <i>Phlpp1</i>            |                                     |
| 217           | <i>PHYHIPL</i>           | <i>Phyhipl</i>           |                                     |
| 218           | <i>PIGP</i>              | <i>Pigp</i>              |                                     |
| 219           | <i>PITX2</i>             | <i>Pitx2</i>             |                                     |
| 220           | <i>PKMYT1</i>            | <i>Pkmyt1</i>            |                                     |
| 221           | <i>PLS1</i>              | <i>Pls1</i>              |                                     |
| 222           | <i>POLG2</i>             | <i>Polg2</i>             |                                     |
| 223           | <i>POLN</i>              | <i>Poln</i>              |                                     |
| 224           | <i>POMT1</i>             | <i>Pomt1</i>             |                                     |
| 225           | <i>PON3</i>              | <i>Pon3</i>              |                                     |
| 226           | <i>PRDM9</i>             | <i>Prdm9</i>             | Y                                   |
| 227           | <i>PRKACB</i>            | <i>Prkacb</i>            |                                     |
| 228           | <i>PRSS21</i>            | <i>Prss21</i>            | Y                                   |
| 229           | <i>PRSS50</i>            | <i>Prss50</i>            |                                     |
| 230           | <i>PSMA8</i>             | <i>Psmas8</i>            |                                     |
| 231           | <i>PSMC3IP</i>           | <i>Psmc3ip</i>           | Y                                   |
| 232           | <i>PSMD10</i>            | <i>Psmd10</i>            |                                     |
| 233           | <i>PTBP2</i>             | <i>Ptbp2</i>             | Y                                   |
| 234           | <i>PXT1</i>              | <i>Pxt1</i>              |                                     |
| 235           | <i>RAD21L1</i>           | <i>Rad21l1</i>           |                                     |
| 236           | <i>RAD51AP2</i>          | <i>Rad51ap2</i>          |                                     |
| 237           | <i>RAD9B</i>             | <i>Rad9b</i>             | Y                                   |
| 238           | <i>RBP4</i>              | <i>Rbp4</i>              | Y                                   |

| <b>Number</b> | <b>Human gene symbol</b> | <b>Mouse gene symbol</b> | <b>Known in meiosis (Reference)</b> |
|---------------|--------------------------|--------------------------|-------------------------------------|
| 239           | <i>REC114</i>            | <i>Rec114</i>            | Y                                   |
| 240           | <i>RIBC2</i>             | <i>Ribc2</i>             |                                     |
| 241           | <i>RNF182</i>            | <i>Rnf182</i>            |                                     |
| 242           | <i>RNF19B</i>            | <i>Rnf19b</i>            |                                     |
| 243           | <i>RNF212</i>            | <i>Rnf212</i>            | Y                                   |
| 244           | <i>RNF32</i>             | <i>Rnf32</i>             |                                     |
| 245           | <i>RPS6KA3</i>           | <i>Rps6ka3</i>           |                                     |
| 246           | <i>RPS6KA6</i>           | <i>Rps6ka6</i>           |                                     |
| 247           | <i>RRAGB</i>             | <i>Rragb</i>             |                                     |
| 248           | <i>RSPH3</i>             | <i>Rsph3</i>             |                                     |
| 249           | <i>RUNDC3B</i>           | <i>Rundc3b</i>           |                                     |
| 250           | <i>RWDD2B</i>            | <i>Rwdd2b</i>            |                                     |
| 251           | <i>SAP30</i>             | <i>Sap30</i>             |                                     |
| 252           | <i>SAPCD1</i>            | <i>Sapcd1</i>            |                                     |
| 253           | <i>SCML1</i>             | <i>Scml1</i>             |                                     |
| 254           | <i>SCML2</i>             | <i>Scml2</i>             | Y                                   |
| 255           | <i>SERHL</i>             | <i>Serhl</i>             |                                     |
| 256           | <i>SH3BGR</i>            | <i>Sh3bgr</i>            |                                     |
| 257           | <i>SHCBP1L</i>           | <i>Shcbp1l</i>           | Y                                   |
| 258           | <i>SIRT3</i>             | <i>Sirt3</i>             |                                     |
| 259           | <i>SKAP1</i>             | <i>Skap1</i>             |                                     |
| 260           | <i>SLC25A31</i>          | <i>Slc25a31</i>          | Y                                   |
| 261           | <i>SLC25A42</i>          | <i>Slc25a42</i>          |                                     |
| 262           | <i>SLC35G2</i>           | <i>Slc35g2</i>           |                                     |
| 263           | <i>SLC4A1AP</i>          | <i>Slc4a1ap</i>          |                                     |
| 264           | <i>SMAP2</i>             | <i>Smap2</i>             |                                     |
| 265           | <i>SMC1B</i>             | <i>Smc1b</i>             | Y                                   |
| 266           | <i>SNRNP40</i>           | <i>Snrnp40</i>           |                                     |
| 267           | <i>SOCS7</i>             | <i>Socs7</i>             |                                     |
| 268           | <i>SPACA1</i>            | <i>Spaca1</i>            | Y                                   |
| 269           | <i>SPAG6</i>             | <i>Spag6</i>             |                                     |
| 270           | <i>SPATA22</i>           | <i>Spata22</i>           | Y                                   |
| 271           | <i>SPDL1</i>             | <i>Spdl1</i>             |                                     |
| 272           | <i>SPDYA</i>             | <i>Spdya</i>             | Y                                   |
| 273           | <i>SPO11</i>             | <i>Spo11</i>             | Y                                   |
| 274           | <i>SPOPL</i>             | <i>Spopl</i>             |                                     |
| 275           | <i>SRR</i>               | <i>Srr</i>               |                                     |
| 276           | <i>STAG3</i>             | <i>Stag3</i>             | Y                                   |
| 277           | <i>STRIP2</i>            | <i>Strip2</i>            |                                     |
| 278           | <i>SUGPI</i>             | <i>Sugp1</i>             |                                     |

| <b>Number</b> | <b>Human gene symbol</b> | <b>Mouse gene symbol</b> | <b>Known in meiosis (Reference)</b> |
|---------------|--------------------------|--------------------------|-------------------------------------|
| 279           | <i>SUGP2</i>             | <i>Sugp2</i>             |                                     |
| 280           | <i>SYCE1</i>             | <i>Syce1</i>             | Y                                   |
| 281           | <i>SYCE2</i>             | <i>Syce2</i>             | Y                                   |
| 282           | <i>SYCE3</i>             | <i>Syce3</i>             | Y                                   |
| 283           | <i>SYCP1</i>             | <i>Sycp1</i>             | Y                                   |
| 284           | <i>SYCP2</i>             | <i>Sycp2</i>             | Y                                   |
| 285           | <i>SYCP3</i>             | <i>Sycp3</i>             | Y                                   |
| 286           | <i>SYNGR4</i>            | <i>Syngr4</i>            |                                     |
| 287           | <i>SYNJ1</i>             | <i>Synj1</i>             |                                     |
| 288           | <i>TAF12</i>             | <i>Taf12</i>             |                                     |
| 289           | <i>TARSL2</i>            | <i>Tarsl2</i>            |                                     |
| 290           | <i>TAZ</i>               | <i>Taz</i>               |                                     |
| 291           | <i>TBC1D2</i>            | <i>Tbc1d2</i>            |                                     |
| 292           | <i>TCP11</i>             | <i>Tcp11</i>             |                                     |
| 293           | <i>TCTEX1D2</i>          | <i>Tctex1d2</i>          |                                     |
| 294           | <i>TCTN1</i>             | <i>Tctn1</i>             |                                     |
| 295           | <i>TDRD9</i>             | <i>Tdrd9</i>             | Y                                   |
| 296           | <i>TEX101</i>            | <i>Tex101</i>            | Y                                   |
| 297           | <i>TEX12</i>             | <i>Tex12</i>             | Y                                   |
| 298           | <i>TEX14</i>             | <i>Tex14</i>             | Y                                   |
| 299           | <i>TEX15</i>             | <i>Tex15</i>             | Y                                   |
| 300           | <i>TEX264</i>            | <i>Tex264</i>            |                                     |
| 301           | <i>TEX30</i>             | <i>Tex30</i>             |                                     |
| 302           | <i>TMEM116</i>           | <i>Tmem116</i>           |                                     |
| 303           | <i>TNFAIP8L3</i>         | <i>Tnfaip8L3</i>         |                                     |
| 304           | <i>TOPAZ1</i>            | <i>Topaz1</i>            | Y                                   |
| 305           | <i>TPTE</i>              | <i>Tpte</i>              |                                     |
| 306           | <i>TRAFD1</i>            | <i>Trafd1</i>            |                                     |
| 307           | <i>TRIP13</i>            | <i>Trip13</i>            | Y                                   |
| 308           | <i>TRMU</i>              | <i>Trmu</i>              |                                     |
| 309           | <i>TSGA10</i>            | <i>Tsga10</i>            |                                     |
| 310           | <i>TTC18</i>             | <i>Ttc18</i>             |                                     |
| 311           | <i>TTC39A</i>            | <i>Ttc39a</i>            |                                     |
| 312           | <i>UBA5</i>              | <i>Uba5</i>              |                                     |
| 313           | <i>UFD1L</i>             | <i>Ufd1</i>              |                                     |
| 314           | <i>UIMC1</i>             | <i>Uimc1</i>             |                                     |
| 315           | <i>UPB1</i>              | <i>Upb1</i>              |                                     |
| 316           | <i>USP37</i>             | <i>Usp37</i>             |                                     |
| 317           | <i>USP6</i>              | <i>Usp6</i>              |                                     |
| 318           | <i>WARS</i>              | <i>Wars</i>              |                                     |

| <b>Number</b> | <b>Human gene symbol</b> | <b>Mouse gene symbol</b> | <b>Known in meiosis (Reference)</b> |
|---------------|--------------------------|--------------------------|-------------------------------------|
| 319           | <i>WBSCR22</i>           | <i>Bud23</i>             |                                     |
| 320           | <i>WDR3</i>              | <i>Wdr3</i>              |                                     |
| 321           | <i>WDR91</i>             | <i>Wdr91</i>             |                                     |
| 322           | <i>VRK1</i>              | <i>Vrk1</i>              | Y                                   |
| 323           | <i>YEATS4</i>            | <i>Yeats4</i>            |                                     |
| 324           | <i>YY2</i>               | <i>Yy2</i>               |                                     |
| 325           | <i>ZCCHC17</i>           | <i>Zcchc17</i>           |                                     |
| 326           | <i>ZCCHC7</i>            | <i>Zcchc7</i>            |                                     |
| 327           | <i>ZCCHC9</i>            | <i>Zcchc9</i>            |                                     |
| 328           | <i>ZCWPW1</i>            | <i>Zcwpw1</i>            |                                     |
| 329           | <i>ZDHHC11</i>           | <i>Zdhhc11</i>           |                                     |
| 330           | <i>ZMAT1</i>             | <i>Zmat1</i>             |                                     |
| 331           | <i>ZMYND12</i>           | <i>Zmynd12</i>           |                                     |
| 332           | <i>ZNF143</i>            | <i>Znf143</i>            |                                     |
| 333           | <i>ZNF280B</i>           | <i>Znf280b</i>           |                                     |
| 334           | <i>ZNF280C</i>           | <i>Znf280c</i>           |                                     |
| 335           | <i>ZNF318</i>            | <i>Znf318</i>            |                                     |
| 336           | <i>ZNF346</i>            | <i>Znf346</i>            |                                     |
| 337           | <i>ZNF398</i>            | <i>Znf398</i>            |                                     |
| 338           | <i>ZNF541</i>            | <i>Znf541</i>            |                                     |
| 339           | <i>ZNF563</i>            | <i>Znf563</i>            |                                     |
| 340           | <i>ZNF622</i>            | <i>Znf622</i>            |                                     |
| 341           | <i>ZNF711</i>            | <i>Znf711</i>            |                                     |
| 342           | <i>ZNF76</i>             | <i>Znf76</i>             |                                     |
| 343           | <i>ZPBP2</i>             | <i>Zpbp2</i>             | Y                                   |

**Table S2. Homology of *Mm*SPO16 to known proteins.**

| Number | Hit    | Name                                                                                                                                                               | Probability | E-value | SS   | Cols | Target Length |
|--------|--------|--------------------------------------------------------------------------------------------------------------------------------------------------------------------|-------------|---------|------|------|---------------|
| 1      | 2M9M_A | Fanconi anemia-associated protein of 24;<br>Fanconi anemia, FAAP24, ERCC4<br>domain; NMR {Homo sapiens}                                                            | 95.99       | 0.02    | 11.7 | 118  | 147           |
| 2      | 2BGW_B | XPF ENDONUCLEASE (E.C.2.7.7.-);<br>HYDROLASE, STRUCTURE<br>SPECIFIC ENDONUCLEASE,<br>NUCLEOTIDE; HET: SO4; 2.8A<br>{AEROPYRUM PERNIX} SCOP:<br>c.52.1.20, a.60.2.5 | 94.85       | 0.55    | 13.4 | 130  | 219           |
| 3      | 2A1I_A | DNA excision repair protein ERCC-1;<br>ERCC1, XPF, NER, central domain;<br>1.9A {Homo sapiens} SCOP: c.52.1.20                                                     | 94.1        | 0.54    | 11.4 | 136  | 146           |
| 4      | 4BXO_A | FANCONI ANEMIA GROUP M<br>PROTEIN; HYDROLASE-DNA<br>COMPLEX, DNA BINDING, PSEUDO-<br>NUCLEASE; 2.15A {HOMO<br>SAPIENS}                                             | 92.14       | 4.3     | 13.3 | 137  | 254           |
| 5      | 2ZIU_B | Mus81 protein, Crossover junction<br>endonuclease; Helix-hairpin-Helix,<br>Alternative splicing, DNA damage; 2.7A<br>{Danio rerio}                                 | 91.94       | 5       | 13.5 | 128  | 341           |
| 6      | 4M6W_A | Fanconi anemia group M protein;<br>FANCM, FAAP24, XPF/Mus81, Fanconi<br>anemia; HET: SO4; 2.9A {Homo                                                               | 91.33       | 4.8     | 12.9 | 131  | 221           |

| Number | Hit    | Name                                                                                                                                           | Probability | E-value | SS   | Cols | Target Length |
|--------|--------|------------------------------------------------------------------------------------------------------------------------------------------------|-------------|---------|------|------|---------------|
|        |        | sapiens}                                                                                                                                       |             |         |      |      |               |
| 7      | 4BXO_B | FANCONI ANEMIA GROUP M PROTEIN; HYDROLASE-DNA COMPLEX, DNA BINDING, PSEUDO-NUCLEASE; 2.15A {HOMO SAPIENS}                                      | 89.1        | 8.7     | 14.5 | 136  | 217           |
| 8      | 6BZG_B | Protein ZIP2, Sporulation-specific protein 16; XPF-ERCC1, Meiosis, Recombination, DNA BINDING; HET: SO4, P6G; 2.13A {Saccharomyces cerevisiae} | 88.28       | 13      | 14   | 132  | 206           |
| 9      | 5UJ7_C | Origin recognition complex subunit 1; Replication, DNA-binding, AAA+ ATPase, DNA; HET: ATP; 3.394A {Homo sapiens}                              | 82.19       | 20      | 9.6  | 124  | 436           |
| 10     | 4P0P_B | Crossover junction endonuclease MUS81, Crossover; resolvase, Hydroase-DNA complex, HYDROLASE-DNA complex; 2.8A {Homo sapiens}                  | 79.86       | 51      | 14   | 133  | 393           |
| 11     | 4P0P_A | Crossover junction endonuclease MUS81, Crossover; resolvase, Hydroase-DNA complex, HYDROLASE-DNA complex; 2.8A {Homo sapiens}                  | 79.5        | 39      | 13.3 | 134  | 306           |

| <b>Number</b> | <b>Hit</b> | <b>Name</b>                                                                                                                   | <b>Probability</b> | <b>E-value</b> | <b>SS</b> | <b>Cols</b> | <b>Target Length</b> |
|---------------|------------|-------------------------------------------------------------------------------------------------------------------------------|--------------------|----------------|-----------|-------------|----------------------|
| 12            | 2ZIV_A     | Mus81 protein, Crossover junction endonuclease; Helix-hairpin-Helix, Alternative splicing, DNA damage; 2.7A {Danio rerio}     | 70.98              | 72             | 14.2      | 144         | 311                  |
| 13            | 1J24_A     | ATP-dependent RNA helicase, putative; structure-specific endonuclease, HYDROLASE; 1.78A {Pyrococcus furiosus} SCOP: c.52.1.20 | 69.25              | 56             | 11.6      | 136         | 143                  |

**Table S3. Primer sequences.**

| Primer name | Genes targeted | Application                                                | Sequences (5'-3')               |
|-------------|----------------|------------------------------------------------------------|---------------------------------|
| P1          | <i>Spo16</i>   | Genotyping<br>(435bp for WT)                               | 5'-TCAGTTTTTAGTTCTTTGACACTGC-3' |
| P2          |                |                                                            | 5'-GTGCATCCACATATTTTACCAAAC-3'  |
| P3          | <i>Spo16</i>   | Genotyping (with P2;<br>209bp/228bp for<br>WT/null allele) | 5'-TTCAAGCATGTCTTATGTTCGTG-3'   |
| S522        | <i>Dmc1</i>    | Genotyping<br>(233bp/147bp for<br>WT/null allele)          | 5'-CCGGCCAGATTACATTTCTT-3'      |
| S523        |                |                                                            | 5'-AAAGGGACTGCTGAGGCATA-3'      |
| S524        |                |                                                            | 5'-GCCAGAGGCCACTTGTGTAG-3'      |
| S519        | <i>Spo11</i>   | Genotyping<br>(165bp/200bp for<br>WT/null allele)          | 5'-CTGCTCAGGGAGGAGAACAC-3'      |
| S520        |                |                                                            | 5'-TCAGGACAGGGCATAGCAGT-3'      |
| S521        |                |                                                            | 5'-GCCAGAGGCCACTTGTGTAG-3'      |
| S317        | <i>Shoc1</i>   | Common primer                                              | 5'-TTGCATTACTTTCAAGTGGTGG-3'    |
| S517        |                | Genotyping (with S317;<br>240bp for WT allele)             | 5'-CGTTCTCTATTCCAGGTGGAGA-3'    |
| S518        |                | Genotyping (with S317;<br>240bp for null allele)           | 5'-TTATCGTTCTCTATTCCAGGTTTG-3'  |
| S067        | <i>Spo16</i>   | RT-PCR (186bp)                                             | 5'-CTGAAGAATGGAGTCTCATGTTCA-3'  |
| S068        |                |                                                            | 5'-GCTCTATGATGTACGCTTTAGTTGT-3' |
| Z531        | <i>Gapdh</i>   | RT-PCR (181bp)                                             | 5'-ACACTGAGGACCAGGTTGTCTC-3'    |
| Z532        |                |                                                            | 5'-TACTCCTTGGAGGCCATGTAG-3'     |
| S642        | <i>Zfy1</i>    | RT-PCR (365bp)                                             | 5'-GCCAGTGCTCTCTTAAACCAA-3'     |
| S643        |                |                                                            | 5'-TGAGTACACAAAGTCCCAGCA-3'     |
| S644        | <i>Zfy2</i>    | RT-PCR (385bp)                                             | 5'-GCCAGTGCTATGTTACACCAT-3'     |
| S645        |                |                                                            | 5'-TCTGTATGCATTGTCCCAGCA-3'     |



**Table S4. Antibody information.**

| <b>Protein name</b> | <b>Manufacture (catalogue number)</b> | <b>Origin</b> | <b>Applications (working dilution)</b> | <b>Website Link</b>                                                                                                                                                                 |
|---------------------|---------------------------------------|---------------|----------------------------------------|-------------------------------------------------------------------------------------------------------------------------------------------------------------------------------------|
| SYCP1               | Abcam (ab15087)                       | Rabbit        | IF (1:200)                             | <a href="https://www.citeab.com/antibodies/771942-ab15087-anti-scp1-antibody">https://www.citeab.com/antibodies/771942-ab15087-anti-scp1-antibody</a>                               |
| SYCP3               | homemade                              | Rat           | IF (1:500)                             | Immunogen: Full length of mouse SYCP3                                                                                                                                               |
| SIX6OS1             | homemade                              | Rabbit        | IF (1:200)                             | Immunogen: aa1-200 of mouse SIX6OS1; Immunized by Capra Science Antibodies AB.                                                                                                      |
| SHOC1/MZIP2         | homemade                              | Rabbit        | WB (1:500);<br>IF (1:100)              | Immunogen: aa474-635 of mouse SHOC1/MZIP2; Immunized by Core facilities, Zhejiang University School of Medicine.                                                                    |
| GFP                 | ThermoFisher (A-11122)                | Rabbit        | IF (1: 500)                            | <a href="https://www.thermofisher.com/antibody/product/GFP-Tag-Antibody-Polyclonal/A-11122">https://www.thermofisher.com/antibody/product/GFP-Tag-Antibody-Polyclonal/A-11122</a>   |
| FLAG                | Sigma-aldrich (F3165)                 | Mouse         | IF (1: 100)                            | <a href="http://www.sigmaaldrich.com/catalog/product/sigma/f3165?lang=en&amp;region=SE">http://www.sigmaaldrich.com/catalog/product/sigma/f3165?lang=en&amp;region=SE</a>           |
| RAD51               | Abcam (ab176458)                      | Rabbit        | IF (1: 200)                            | <a href="http://www.abcam.com/rad51-antibody-chip-grade-ab176458.html">http://www.abcam.com/rad51-antibody-chip-grade-ab176458.html</a>                                             |
| DMC1                | Abcam (ab11054)                       | Mouse         | IF (1: 100)                            | <a href="http://www.abcam.com/dmc1-antibody-2h124-ab11054.html">http://www.abcam.com/dmc1-antibody-2h124-ab11054.html</a>                                                           |
| RPA1                | Abcam (ab87272)                       | Rabbit        | IF (1: 50)                             | <a href="http://www.abcam.com/rpa70-antibody-ab87272.html">http://www.abcam.com/rpa70-antibody-ab87272.html</a>                                                                     |
| RPA2                | Cell Signaling (2208T)                | Rat           | IF (1: 100)                            | <a href="https://www.cellsignal.com/products/primary-antibodies/rpa32-rpa2-4e4-rat-mab/2208">https://www.cellsignal.com/products/primary-antibodies/rpa32-rpa2-4e4-rat-mab/2208</a> |
| SPATA22             | Proteintech (16989-1-AP)              | Rabbit        | IF (1: 100)                            | <a href="http://www.ptglab.com/products/SPATA22-Antibody-16989-1-AP.htm">http://www.ptglab.com/products/SPATA22-Antibody-16989-1-AP.htm</a>                                         |

|                   |                                                    |            |                              |                                                                                                                                                                                                                                                                                                                         |
|-------------------|----------------------------------------------------|------------|------------------------------|-------------------------------------------------------------------------------------------------------------------------------------------------------------------------------------------------------------------------------------------------------------------------------------------------------------------------|
| MLH1              | BD (551092)                                        | Mouse      | IF (1: 200)                  | <a href="http://www.bdbiosciences.com/us/applications/research/apoptosis/purified-antibodies/purified-mouse-anti-mlh-1-with-control/p/551092">http://www.bdbiosciences.com/us/applications/research/apoptosis/purified-antibodies/purified-mouse-anti-mlh-1-with-control/p/551092</a>                                   |
| MSH4              | Abcam (ab58666)                                    | Rabbit     | IF (1: 50)                   | <a href="http://www.abcam.com/msh4-antibody-ab58666.html">http://www.abcam.com/msh4-antibody-ab58666.html</a>                                                                                                                                                                                                           |
| MVH               | Abcam (ab13840)                                    | Rabbit     | IF (1: 200);<br>IHC (1: 400) | <a href="http://www.abcam.com/ddx4--mvh-antibody-ab13840.html">http://www.abcam.com/ddx4--mvh-antibody-ab13840.html</a>                                                                                                                                                                                                 |
| $\gamma$ H2AX     | Cell Signaling (9718S)                             | Rabbit     | IF (1: 400)                  | <a href="https://www.cellsignal.com/products/primary-antibodies/phospho-histone-h2a-x-ser139-20e3-rabbit-mab/9718?N=4294956287&amp;Ntt=h2a.x&amp;fromPage=plp">https://www.cellsignal.com/products/primary-antibodies/phospho-histone-h2a-x-ser139-20e3-rabbit-mab/9718?N=4294956287&amp;Ntt=h2a.x&amp;fromPage=plp</a> |
| Cleaved caspase 3 | Cell Signaling (9664S)                             | Rabbit     | IF (1: 200)                  | <a href="https://www.cellsignal.com/products/primary-antibodies/cleaved-caspase-3-asp175-5a1e-rabbit-mab/9664">https://www.cellsignal.com/products/primary-antibodies/cleaved-caspase-3-asp175-5a1e-rabbit-mab/9664</a>                                                                                                 |
| TRF1              | homemade                                           | Mouse      | IF (1:200)                   | Immunogen: Full length of mouse TRF1                                                                                                                                                                                                                                                                                    |
| HORMAD 1          | Abcam (ab155176)                                   | Rabbit     | IF (1: 200)                  | <a href="http://www.abcam.com/hormad1-antibody-ab155176.html">http://www.abcam.com/hormad1-antibody-ab155176.html</a>                                                                                                                                                                                                   |
| CREST             | Fitzgerald Industries (70R-21494)                  | Human      | IF (1: 200)                  | <a href="https://www.fitzgerald-fii.com/crest-antibody-70r-21494.html">https://www.fitzgerald-fii.com/crest-antibody-70r-21494.html</a>                                                                                                                                                                                 |
| PLZF              | Santa Cruz (sc-22839)                              | Mouse      | IF (1:200)                   | <a href="https://www.scbt.com/scbt/sv/product/plzf-antibody-h-300?requestFrom=search">https://www.scbt.com/scbt/sv/product/plzf-antibody-h-300?requestFrom=search</a>                                                                                                                                                   |
| H1T               | Gifted by Mary Ann Handel and Ewelina Bolcun-Filas | Guinea pig | IF (1:200)                   |                                                                                                                                                                                                                                                                                                                         |
